# Supplementary material for: Conjugated thiophenoazomethines: electrochromic materials exhibiting visible-to-near-IR color changes
Source: Royal Society of Chemistry journal article supplement (doi:10.1039/c3tc30494a), 2013-01-01
Supplement: c3tc30494a.pdf [file c3tc30494a.pdf]

## Supporting Information

### Thiophenoazomethines: Electrochromic Materials Exhibiting Visible-to-Near-IR Color Changes and Tuneable Colors Contingent on Degree of Conjugation

Satyananda Barik,<sup>1,2†</sup> Daminda Navarathne,<sup>1†</sup> Maxence LeBorgne,<sup>1,3</sup> W. G. Skene<sup>1\*</sup>

<sup>1</sup>Laboratoire de caractérisation photophysique des matériaux conjugués  
Département de Chimie, Pavillon JA Bombardier,  
Université de Montréal, CP 6128, succ. Centre-ville,  
Montréal, Québec, Canada H3C 3J7

<sup>2</sup>Current address: Institute of Chemical and Engineering Sciences  
1 Pesek Road, Jurong Island  
Singapore-627833  
Singapore

<sup>3</sup>Current address: Département de chimie  
Institut Universitaire de Technologie Besançon-Vesoul  
30 Avenue de l'Observatoire - BP 1559 – 25009  
Besançon cedex France

<sup>†</sup>Contributed equally to the manuscript

Corresponding Author Email: [w.skene@umontreal.ca](mailto:w.skene@umontreal.ca)

## Table of Contents

|                                                                                                                                                                                                                                                                                     |    |
|-------------------------------------------------------------------------------------------------------------------------------------------------------------------------------------------------------------------------------------------------------------------------------------|----|
| FIGURE S1. ABSORBANCE SPECTRA OF THIN-FILM OF <b>7</b> (—), <b>8</b> (—), <b>9</b> (—), <b>10</b> (—) AND <b>11</b> (—) ON GLASS SUBSTRATES. ....                                                                                                                                   | 3  |
| FIGURE S2. ABSORBANCE SPECTRA OF NEUTRAL <b>8</b> (—) IN SOLUTION RECORDED WITH THE ADDITION OF FeCl <sub>3</sub> (—) FOLLOWED BY THE ADDITION OF HYDRAZINE HYDRATE (—). ....                                                                                                       | 4  |
| FIGURE S3. ABSORBANCE SPECTRA OF <b>8</b> (—) WITH THE ADDITION OF TRIFLUOROACETIC ACID (—) FOLLOWED BY THE ADDITION OF TRIETHYLAMINE (—). ....                                                                                                                                     | 5  |
| FIGURE S4. GEL PERMEATION ELUGRAMS OF <b>7</b> (■), <b>8</b> (●), <b>9</b> (▲), <b>10</b> (▼) AND <b>11</b> (◆) MEASURED IN THF. ....                                                                                                                                               | 6  |
| FIGURE S5. ANODIC CYCLIC VOLTAMMOGRAMS OF <b>9</b> MEASURED IN DICHLOROMETHANE WITH TBAPF <sub>6</sub> AS THE SUPPORTING ELECTROLYTE. ....                                                                                                                                          | 7  |
| FIGURE S6. ANODIC CYCLIC VOLTAMMOGRAMS OF <b>10</b> MEASURED IN DICHLOROMETHANE WITH TBAPF <sub>6</sub> AS THE SUPPORTING ELECTROLYTE. ....                                                                                                                                         | 8  |
| FIGURE S7. CYCLIC VOLTAMMOGRAM (—) AND DIFFERENTIAL PULSE VOLTAMMOGRAMS (—) OF <b>11</b> IN 10 <sup>-4</sup> M POLYMER SOLUTION IN 0.1 M TBAPF <sub>6</sub> /DICHLOROMETHANE WITH FERROCENE AS THE INTERNAL STANDARD. THE POTENTIALS ARE REPORTED AGAINST Fc/Fc <sup>+</sup> . .... | 9  |
| FIGURE S8. <sup>1</sup> H NMR SPECTRUM OF <b>1</b> RECORDED IN ACETONE-D <sub>6</sub> . ....                                                                                                                                                                                        | 10 |
| FIGURE S9. <sup>1</sup> H NMR SPECTRUM OF <b>3</b> RECORDED IN CDCl <sub>3</sub> . ....                                                                                                                                                                                             | 11 |
| FIGURE S10. <sup>1</sup> H NMR SPECTRUM OF <b>6</b> RECORDED IN CDCl <sub>3</sub> . ....                                                                                                                                                                                            | 12 |
| FIGURE S11. <sup>1</sup> H NMR SPECTRUM OF <b>9</b> RECORDED IN CDCl <sub>3</sub> . ....                                                                                                                                                                                            | 13 |
| FIGURE S12. <sup>1</sup> H NMR SPECTRUM OF <b>10</b> MEASURED IN CDCl <sub>3</sub> . ....                                                                                                                                                                                           | 14 |
| FIGURE S13. <sup>1</sup> H NMR SPECTRUM OF <b>7</b> RECORDED IN ACETONE-D <sub>6</sub> . ....                                                                                                                                                                                       | 15 |
| FIGURE S14. <sup>13</sup> C NMR SPECTRUM OF <b>7</b> RECORDED IN ACETONE-D <sub>6</sub> . ....                                                                                                                                                                                      | 16 |
| FIGURE S15. <sup>1</sup> H NMR SPECTRUM OF <b>8</b> RECORDED IN ACETONE-D <sub>6</sub> . ....                                                                                                                                                                                       | 17 |
| FIGURE S16. <sup>13</sup> C NMR SPECTRUM OF <b>8</b> RECORDED IN ACETONE-D <sub>6</sub> . ....                                                                                                                                                                                      | 18 |
| FIGURE S17. <sup>1</sup> H NMR SPECTRUM OF <b>11</b> RECORDED IN ACETONE-D <sub>6</sub> . ....                                                                                                                                                                                      | 19 |

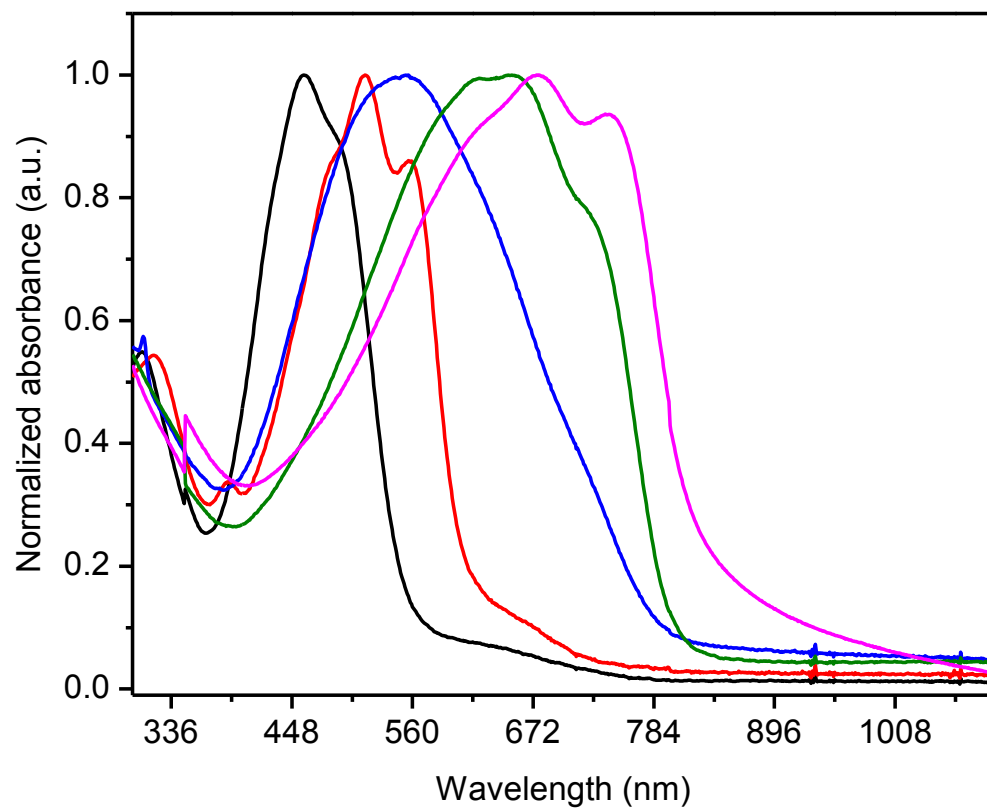

Figure S1. Absorbance spectra of thin-film of **7** (—), **8** (—), **9** (—), **10** (—) and **11** (—) on glass substrates.

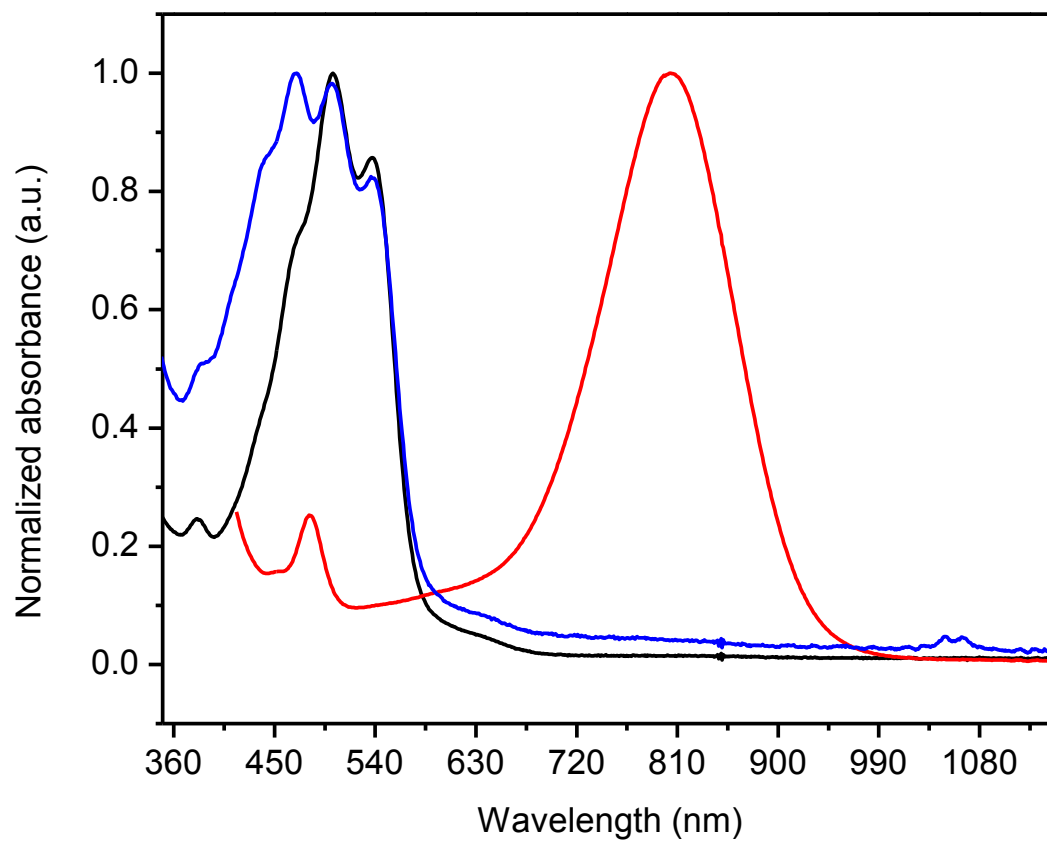

Figure S2. Absorbance spectra of neutral **8** (—) in solution recorded with the addition of  $\text{FeCl}_3$  (—) followed by the addition of hydrazine hydrate (—).

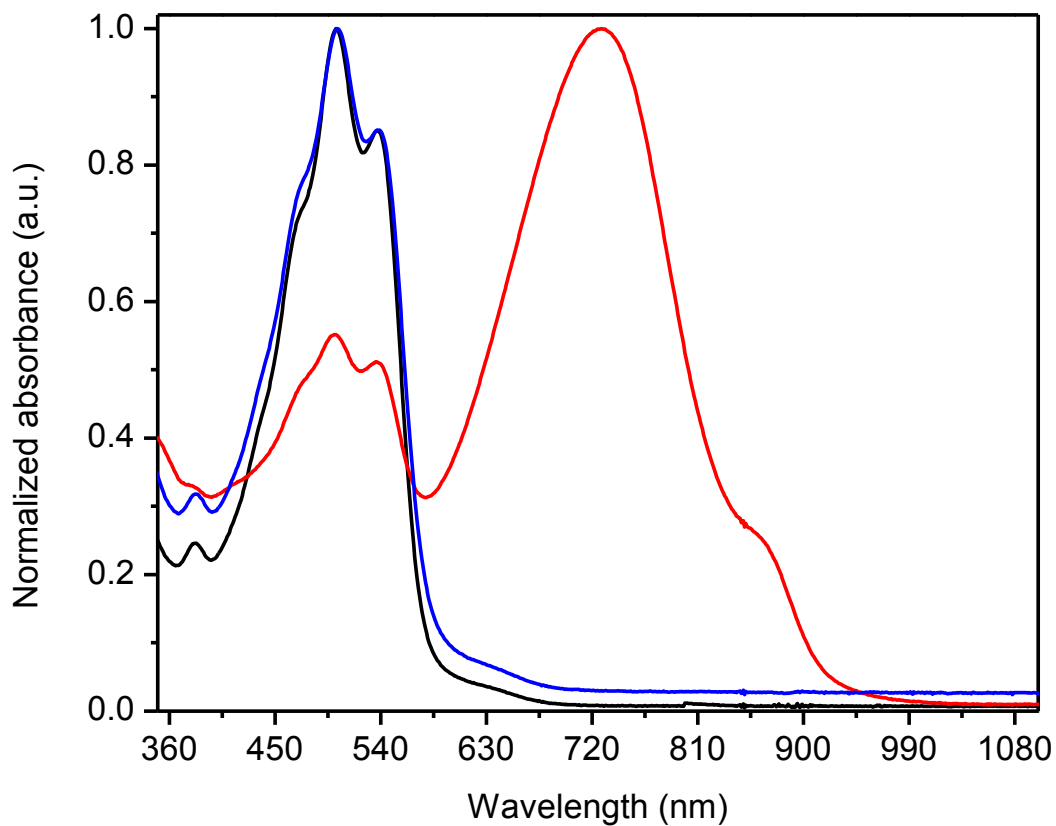

Figure S3. Absorbance spectra of **8** (—) with the addition of trifluoroacetic acid (—) followed by the addition of triethylamine (—).

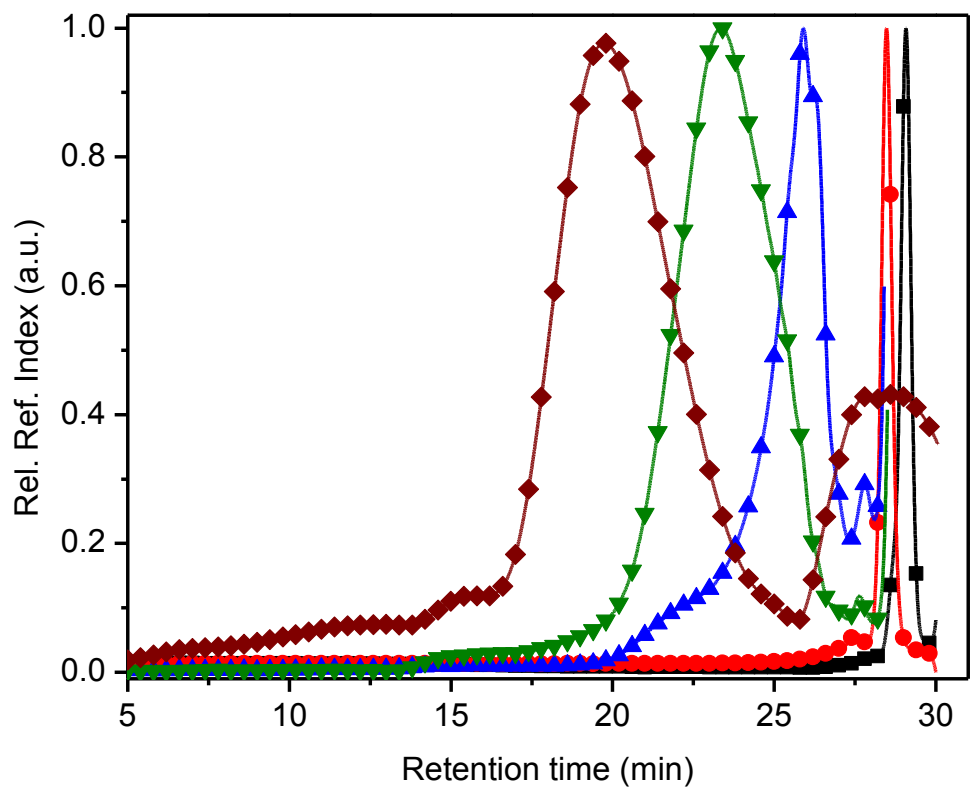

Figure S4. Gel permeation elugrams of **7** (■), **8** (●), **9** (▲), **10** (▼) and **11** (◆) measured in THF.

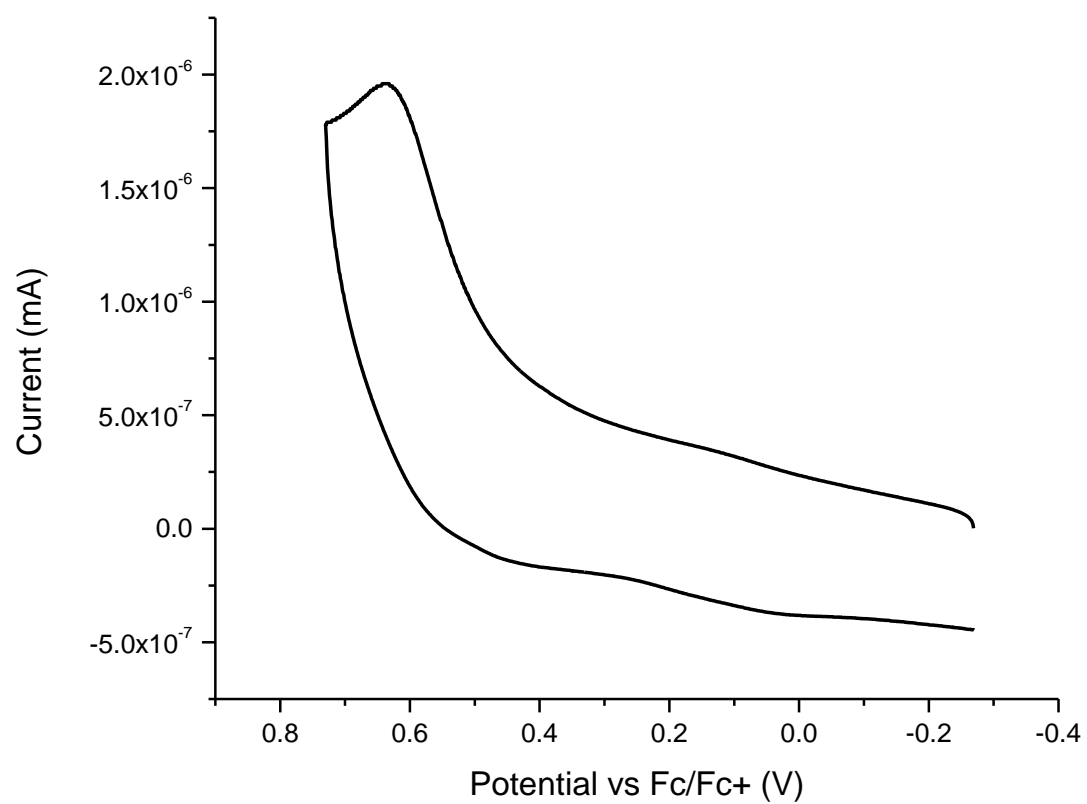

Figure S5. Anodic cyclic voltammograms of **9** measured in dichloromethane with TBAPF<sub>6</sub> as the supporting electrolyte.

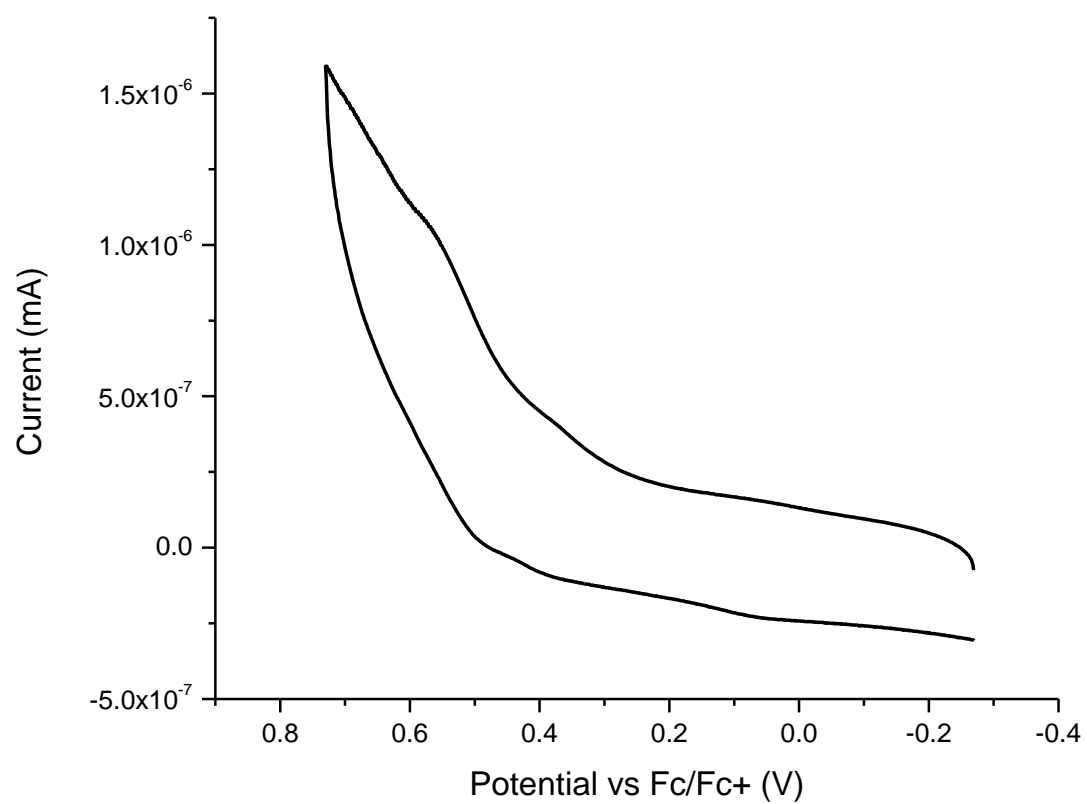

Figure S6. Anodic cyclic voltammograms of **10** measured in dichloromethane with TBAPF<sub>6</sub> as the supporting electrolyte.

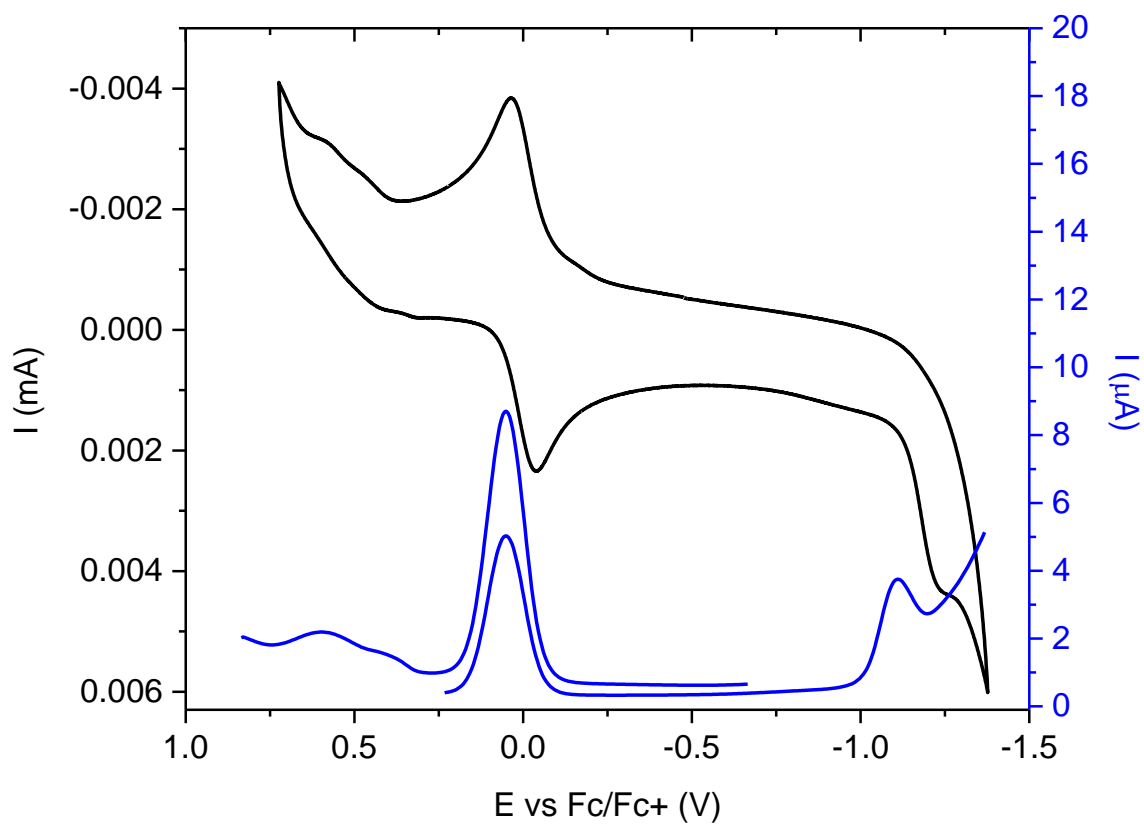

Figure S7. Cyclic voltammogram (—) and differential pulse voltammograms (—) of **11** in  $10^{-4}$  M polymer solution in 0.1 M TBAPF<sub>6</sub>/dichloromethane with ferrocene as the internal standard. The potentials are reported against  $Fc/Fc^+$ .

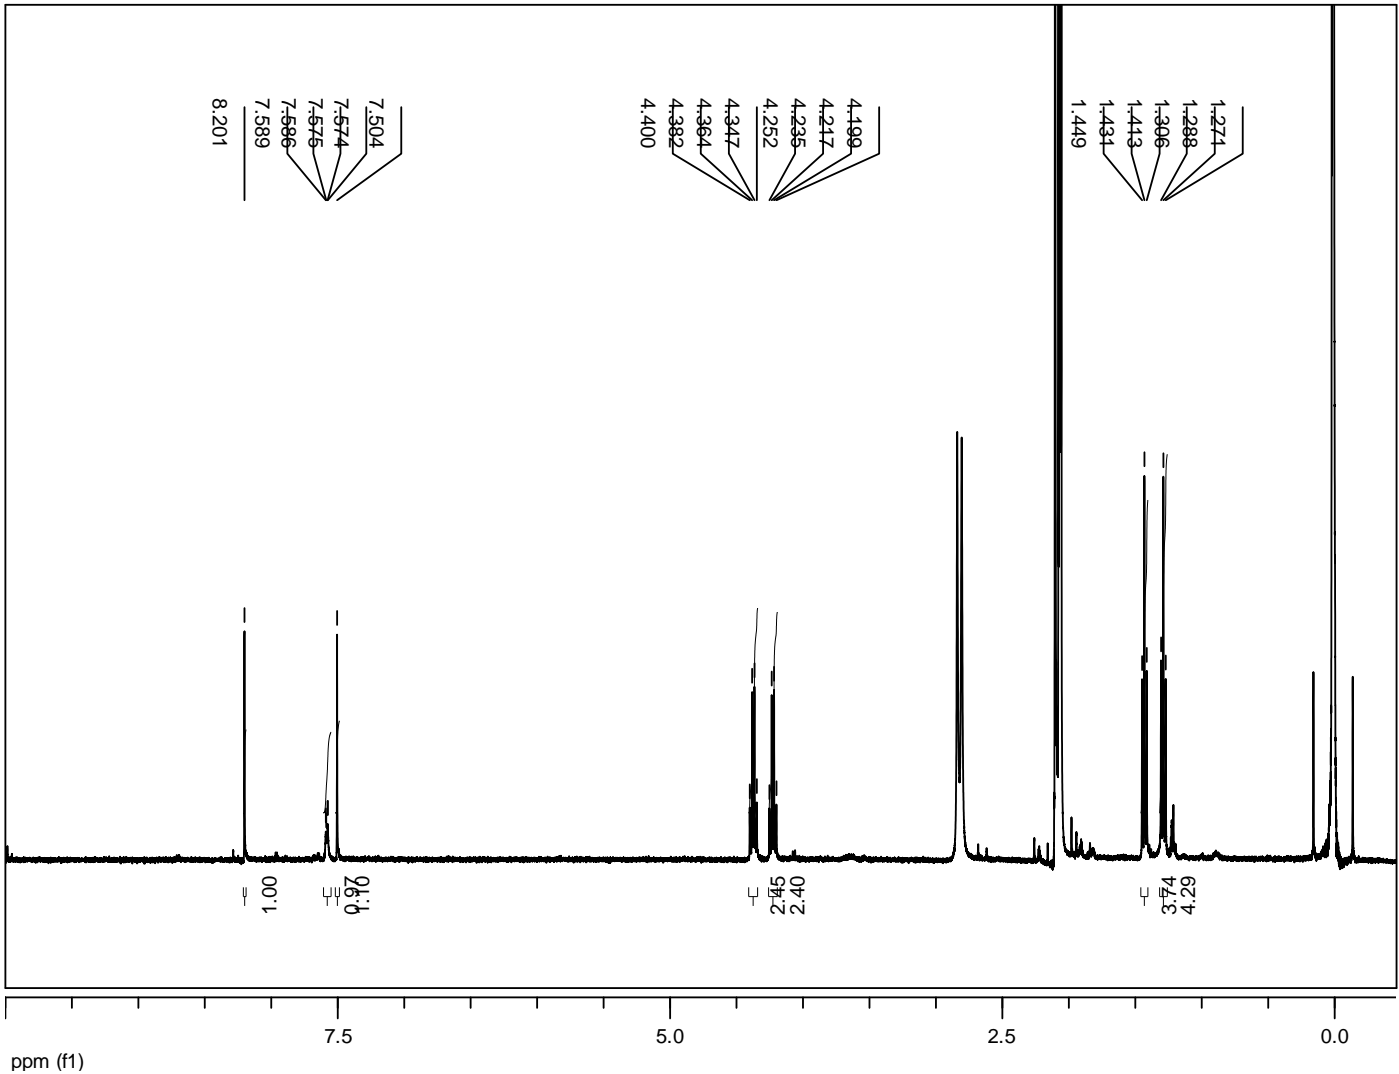

Figure S8. <sup>1</sup>H NMR spectrum of **1** recorded in acetone-d<sub>6</sub>.

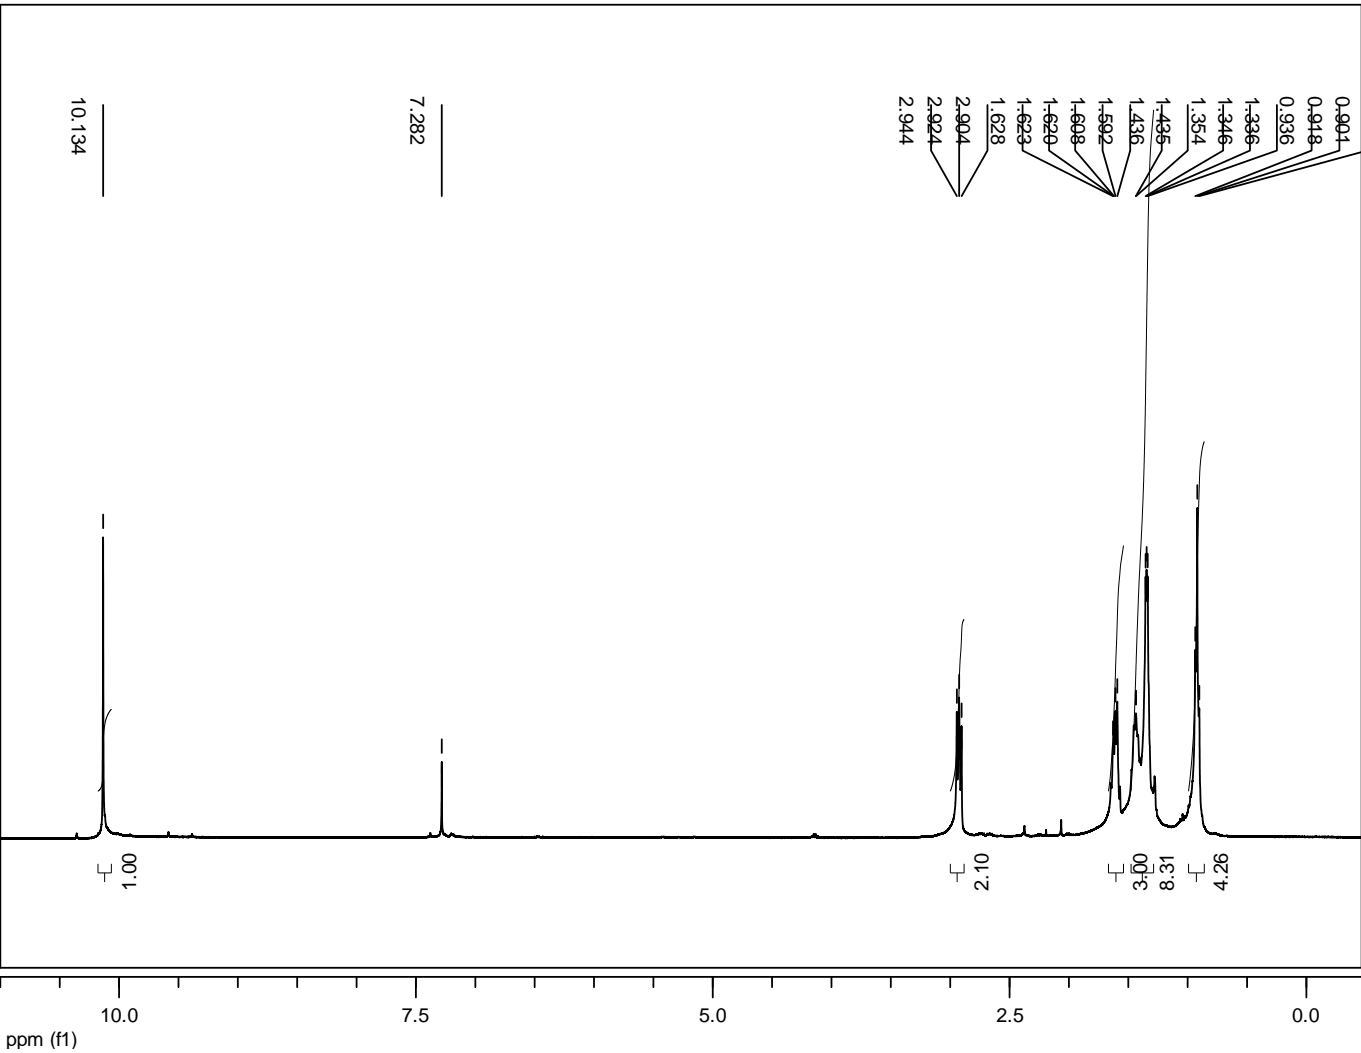

Figure S9.  $^1\text{H}$  NMR spectrum of **3** recorded in  $\text{CDCl}_3$ .

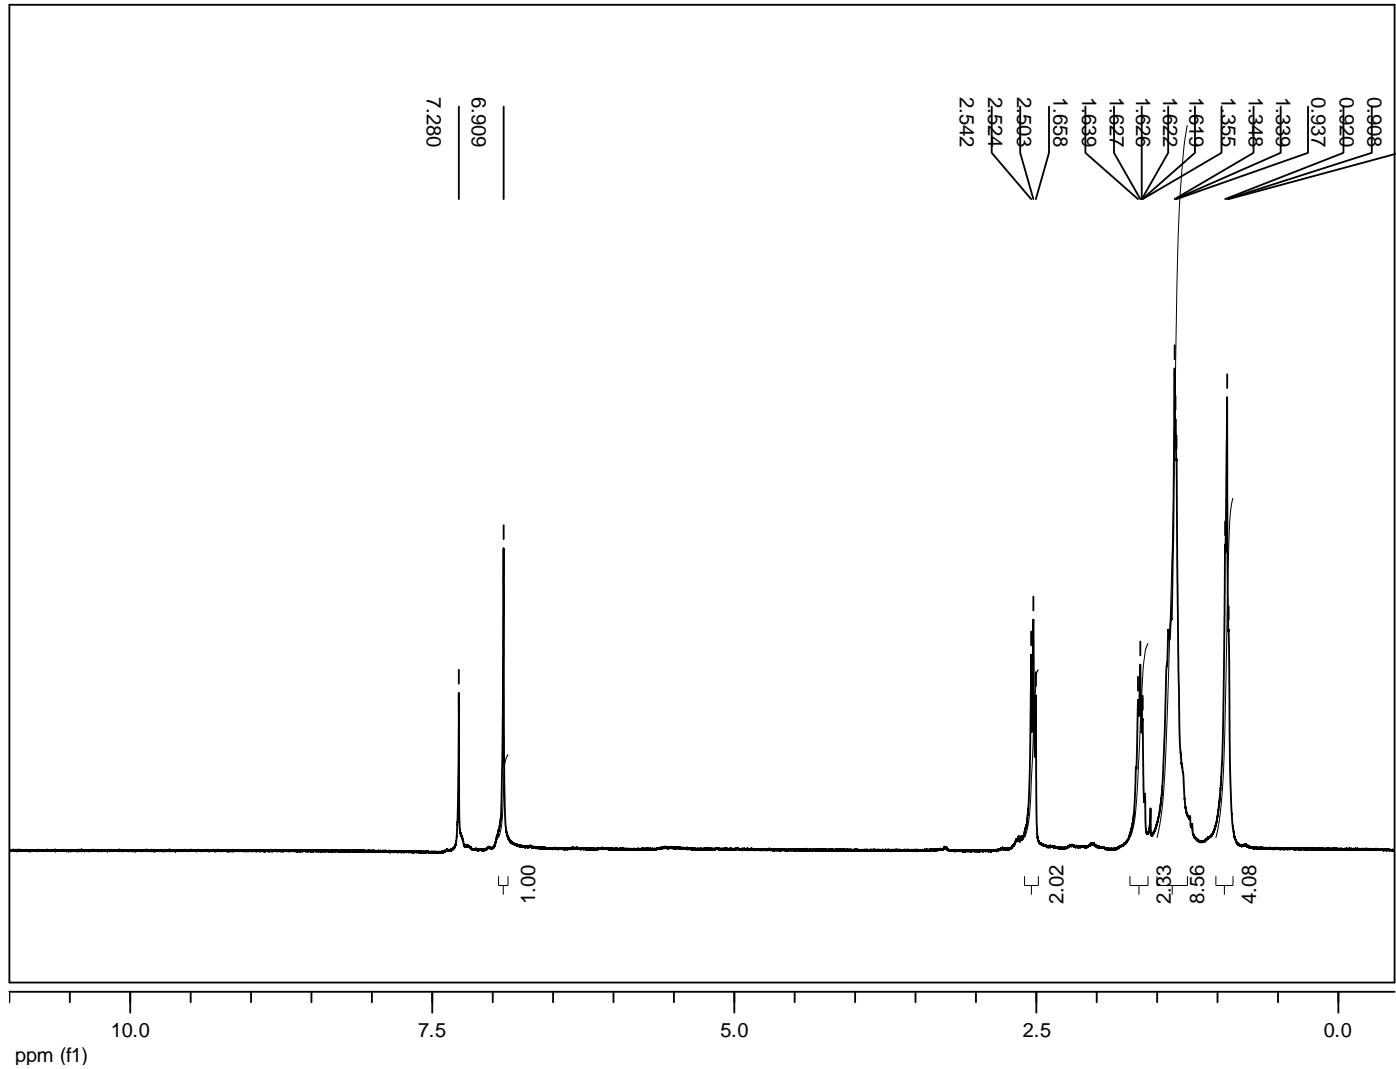

Figure S10.  $^1\text{H}$  NMR spectrum of **6** recorded in  $\text{CDCl}_3$ .

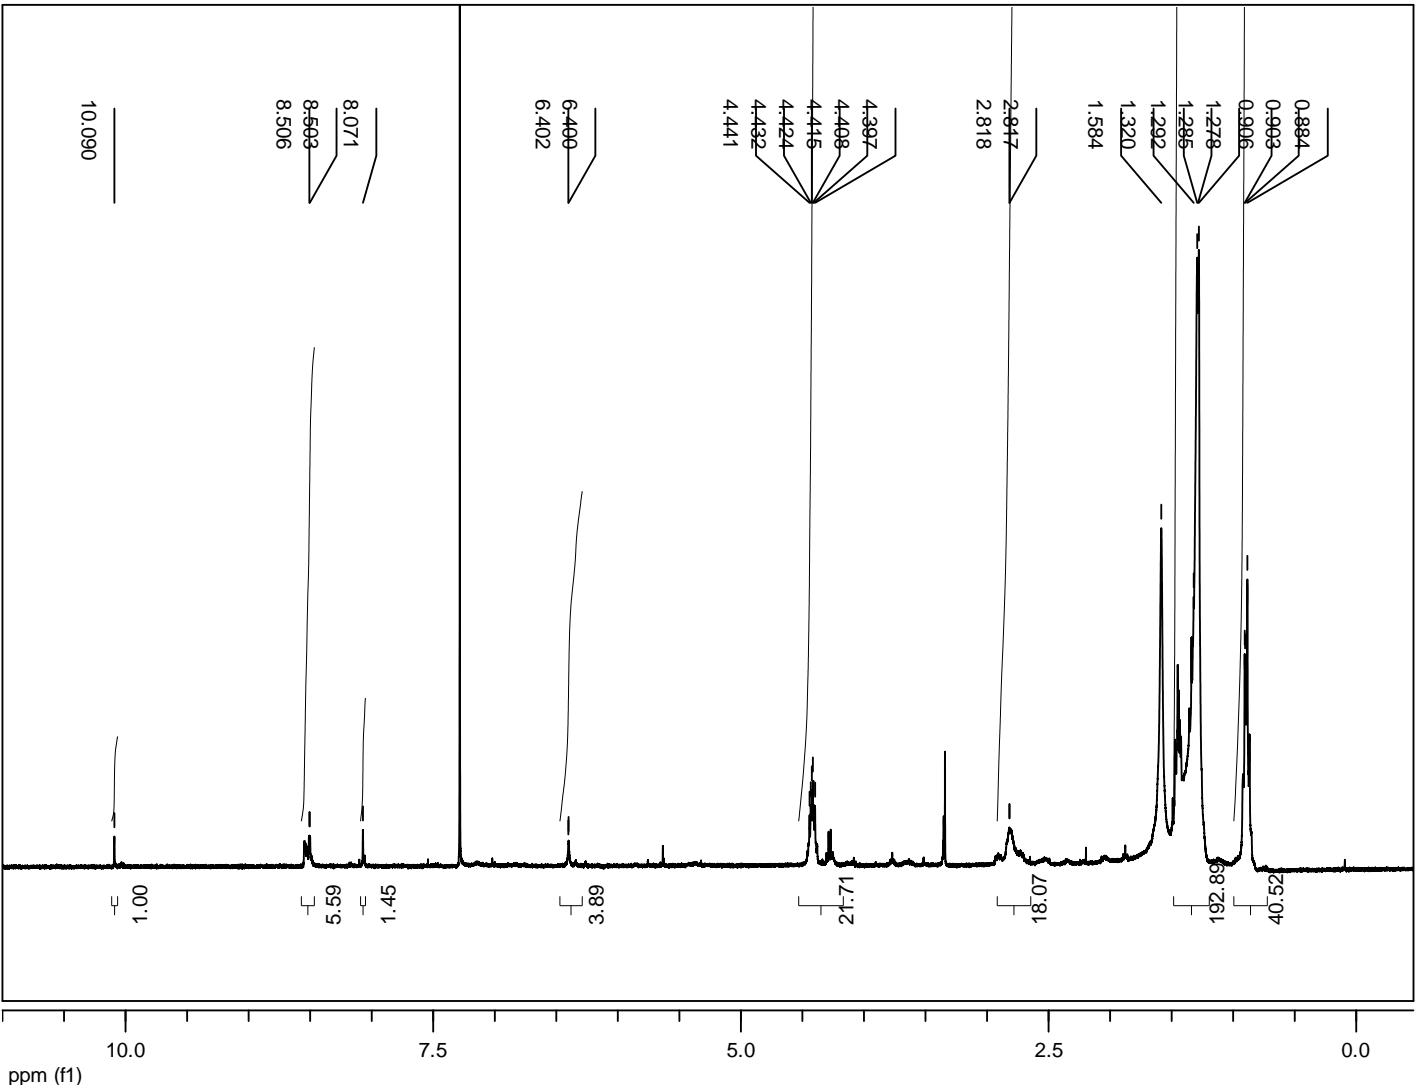

Figure S11. <sup>1</sup>H NMR spectrum of **9** recorded in CDCl<sub>3</sub>.

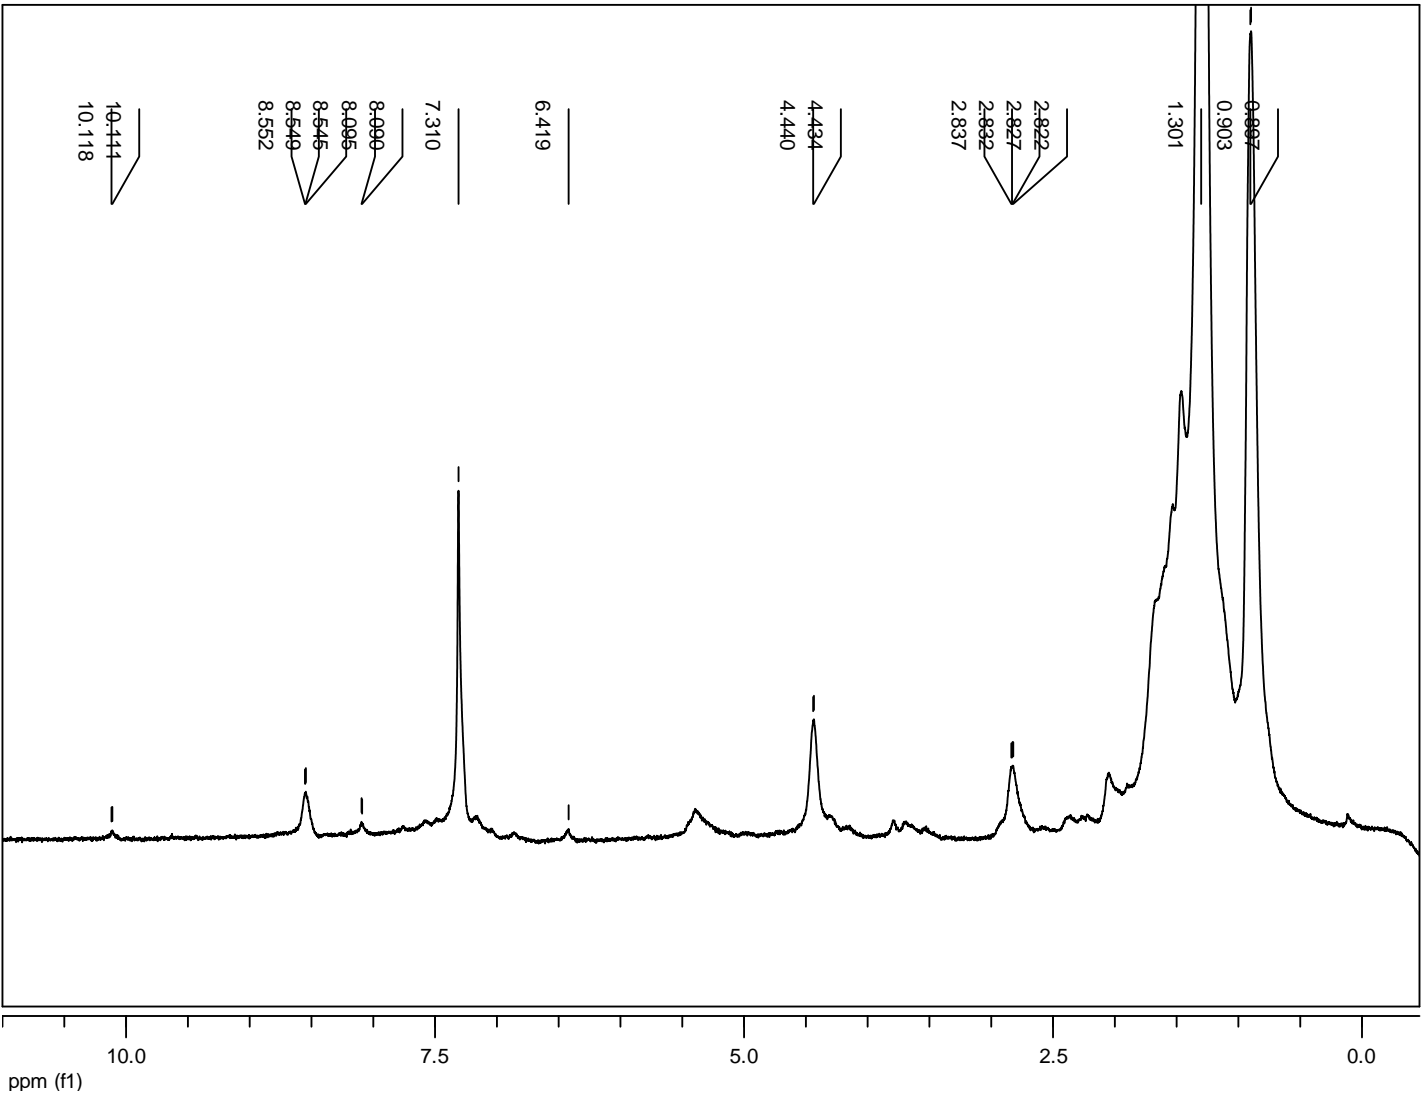

Figure S12.  $^1\text{H}$  NMR spectrum of **10** measured in  $\text{CDCl}_3$ .

S15

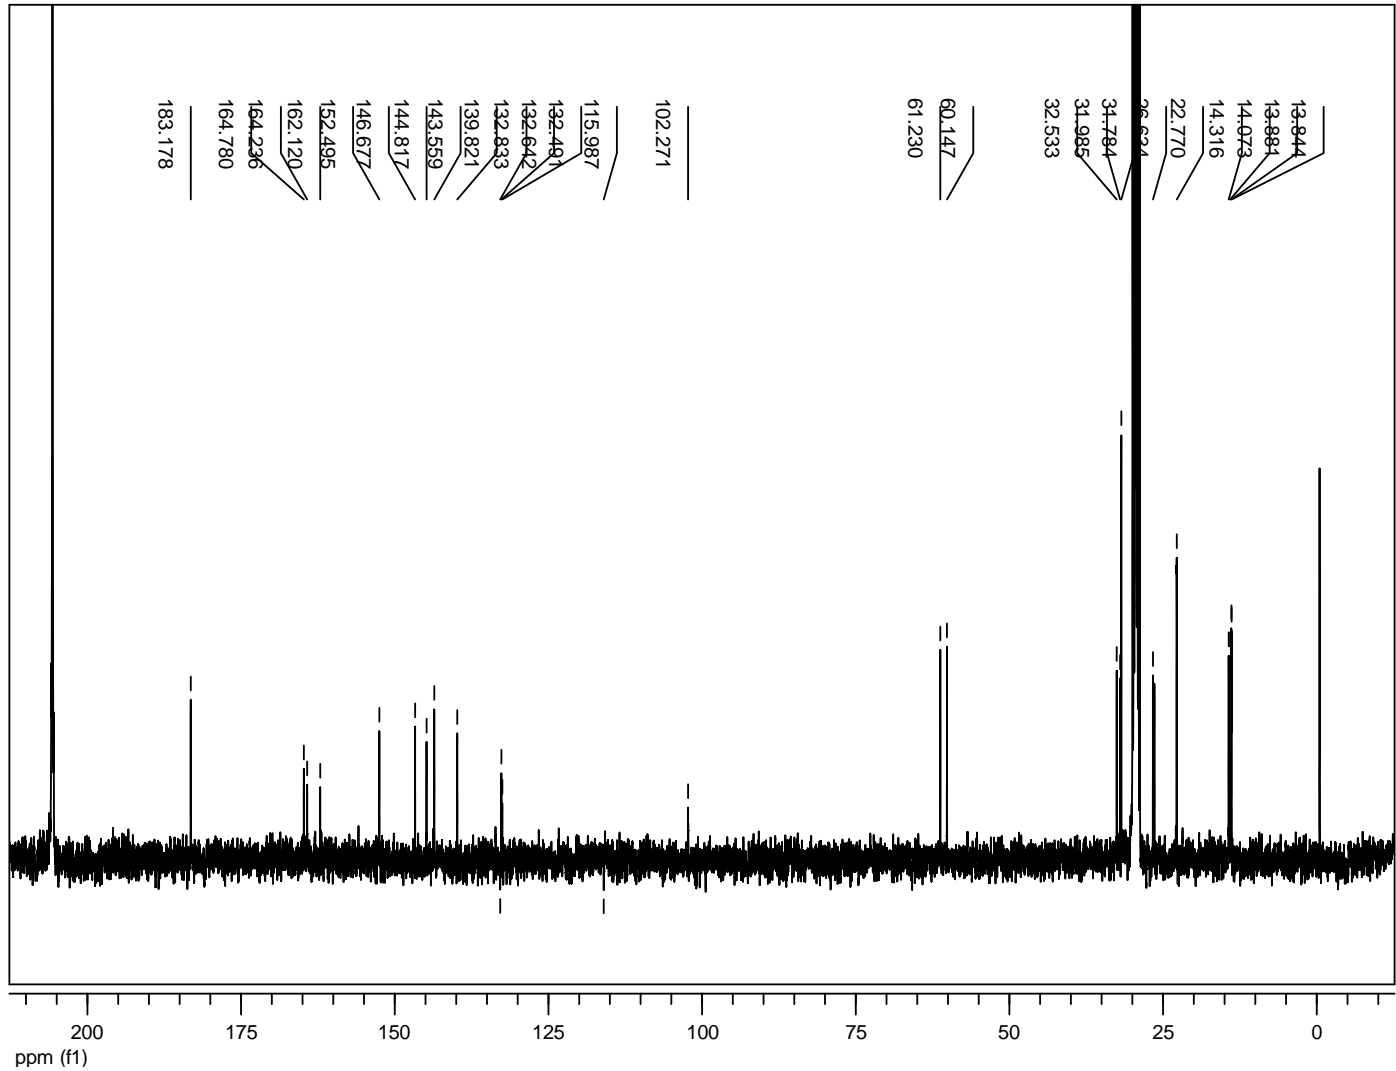

Figure S14.  $^{13}\text{C}$  NMR spectrum of **7** recorded in acetone- $\text{d}_6$ .

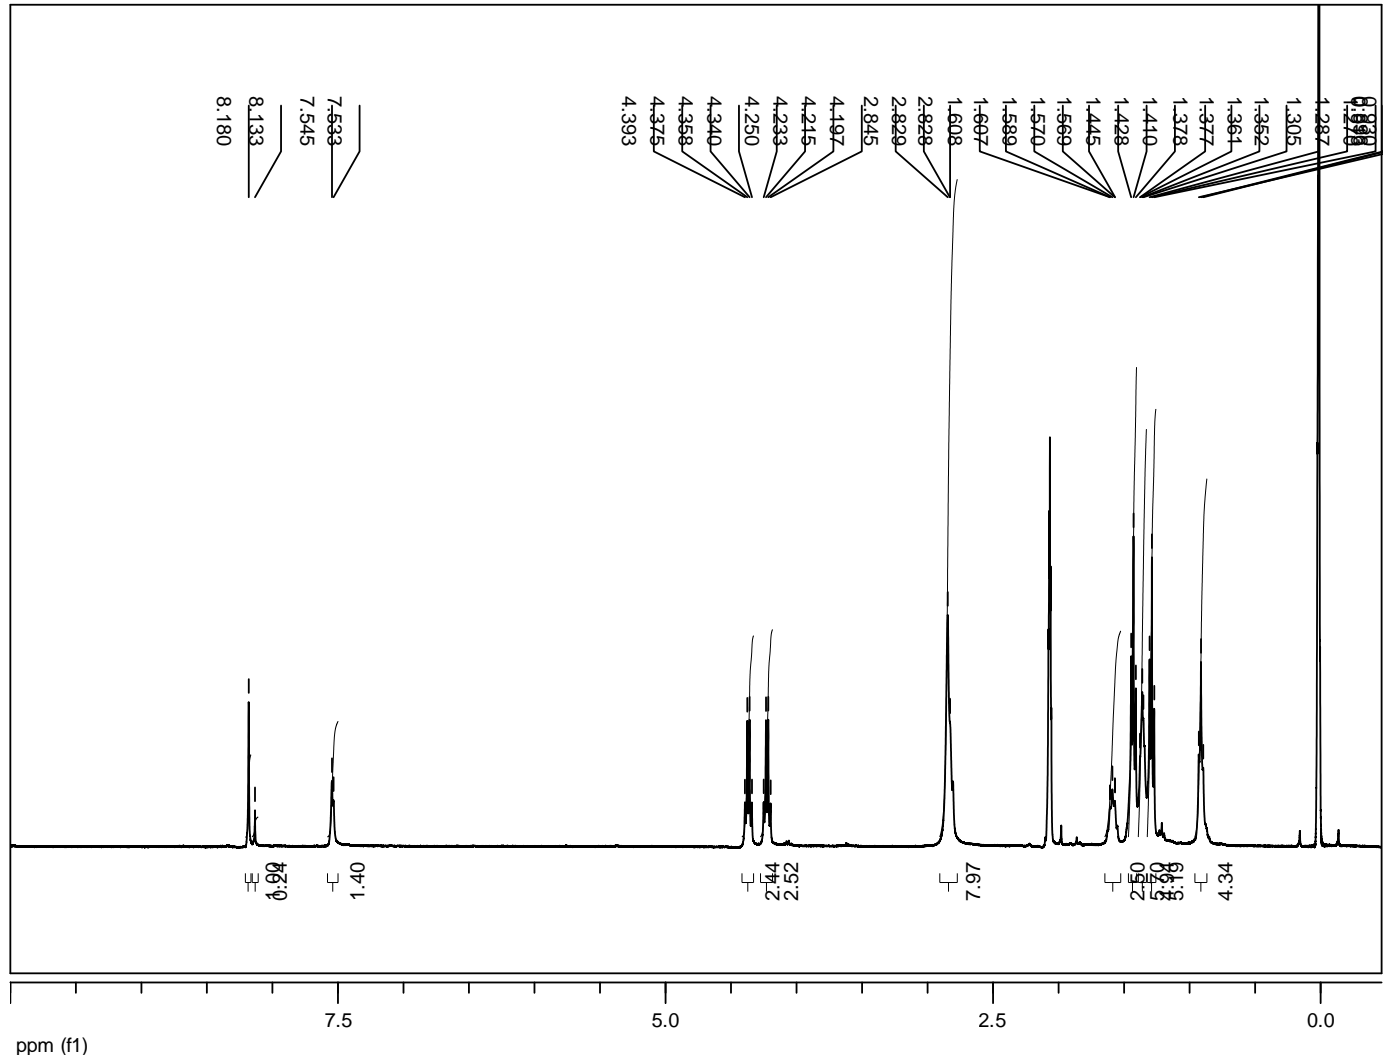

Figure S15. <sup>1</sup>H NMR spectrum of **8** recorded in acetone-d<sub>6</sub>.

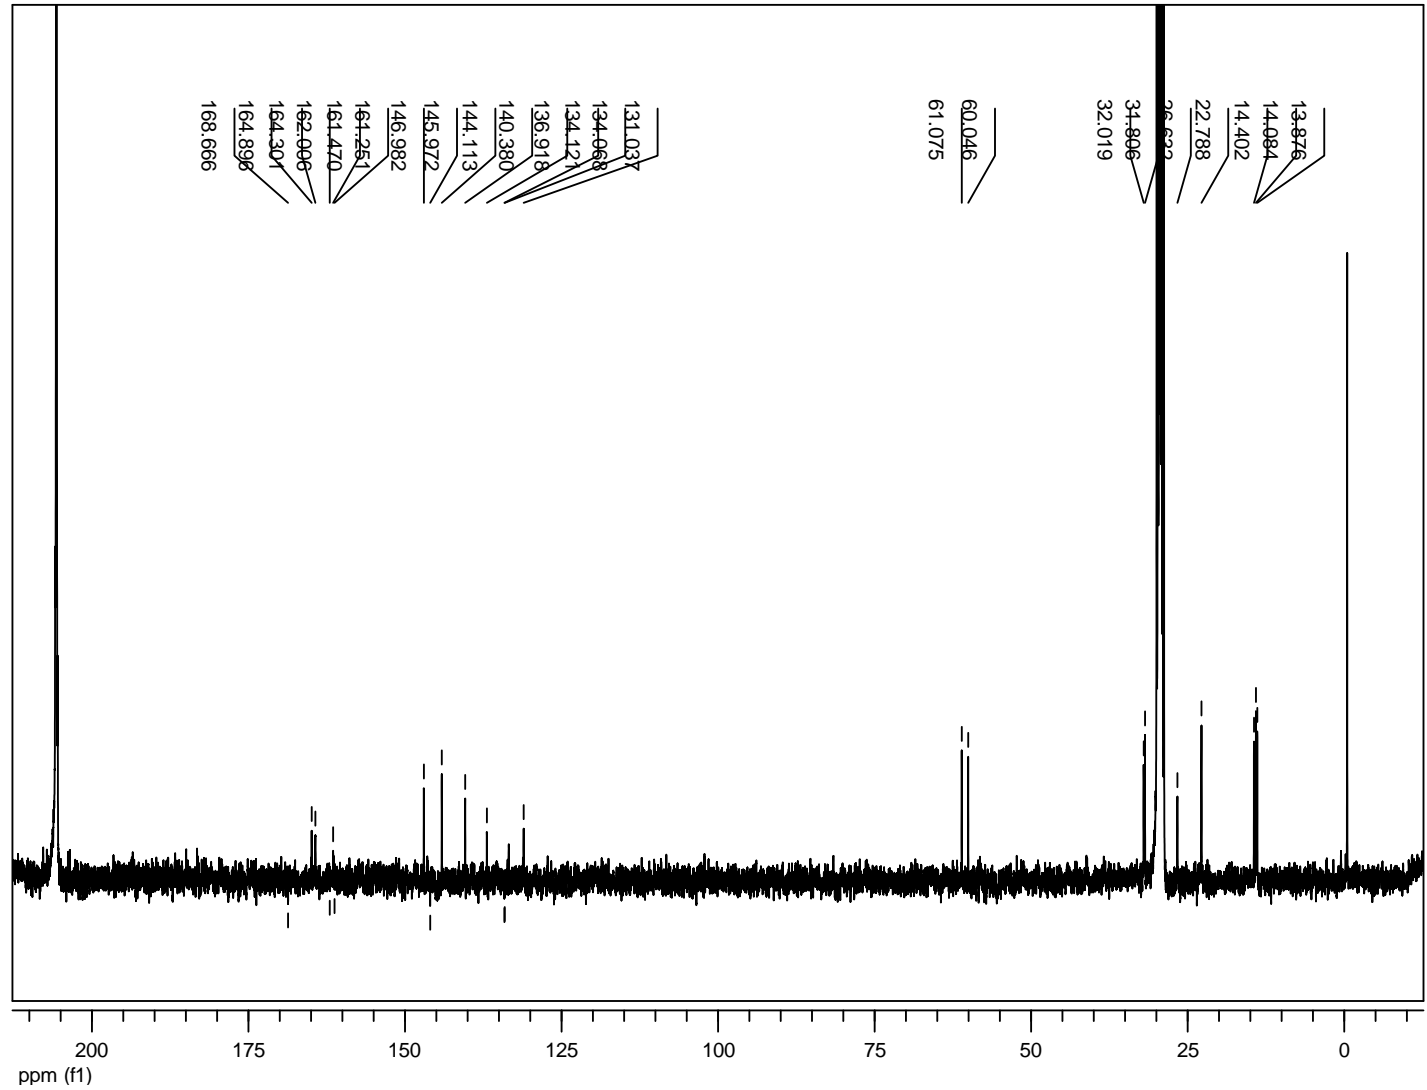

Figure S16. <sup>13</sup>C NMR spectrum of **8** recorded in acetone-d<sub>6</sub>.

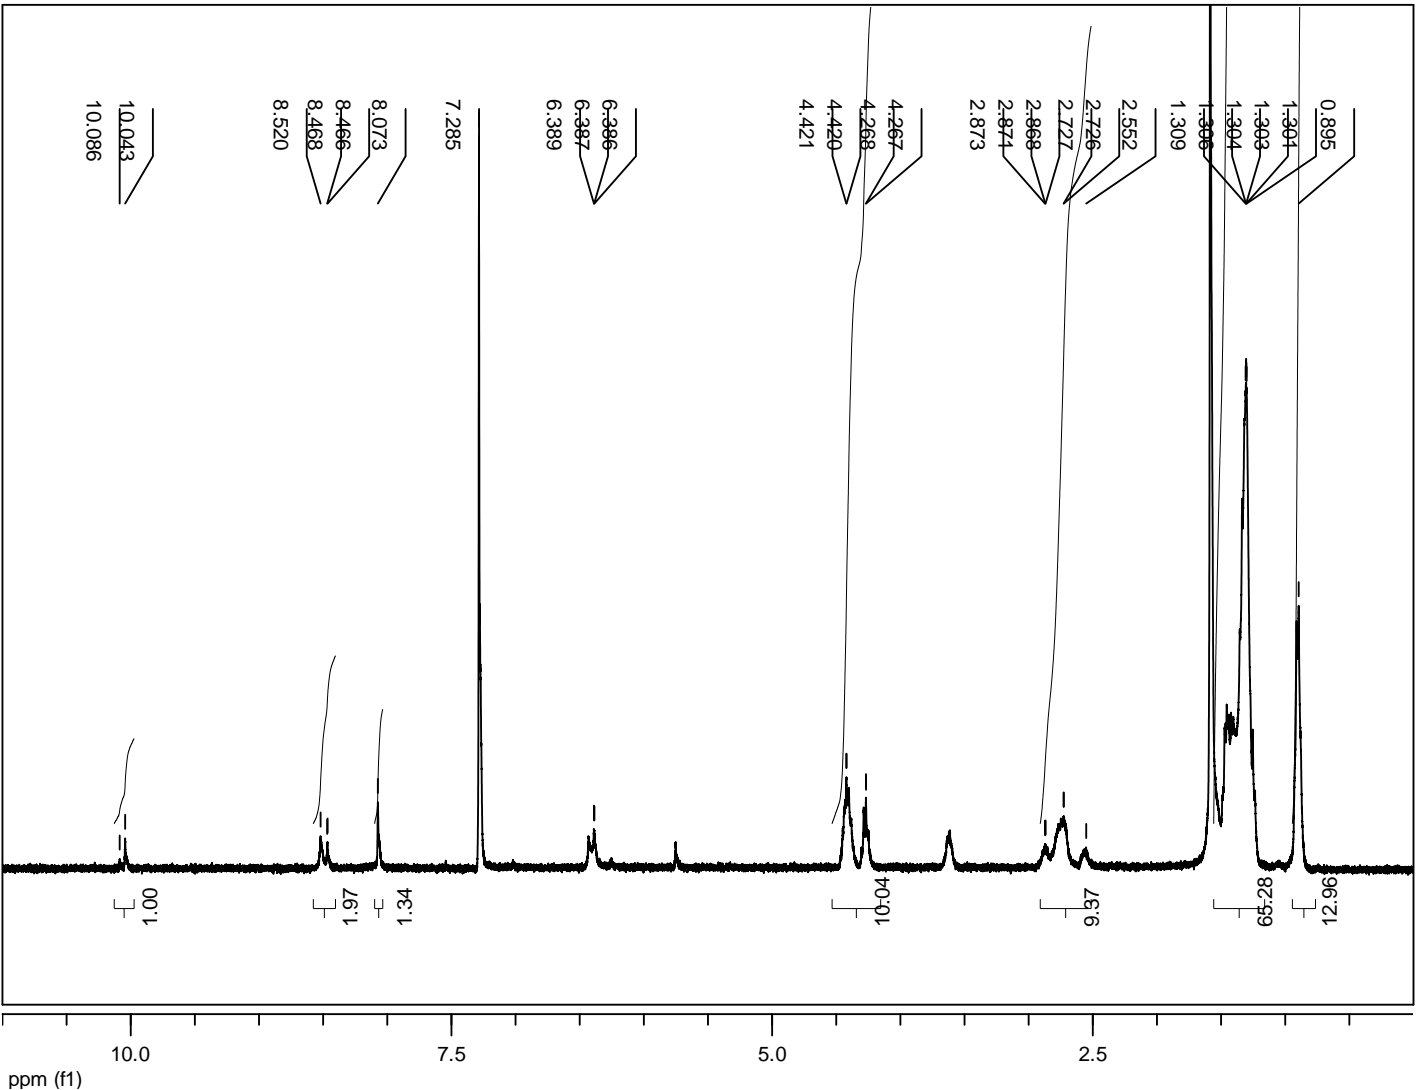

Figure S17. <sup>1</sup>H NMR spectrum of **11** recorded in acetone-d<sub>6</sub>.
